# MicroRNA-595 sensitizes ovarian cancer cells to cisplatin by targeting ABCB1

Songyu Tian<sup>1</sup>, Mingyue Zhang<sup>2</sup>, Xiuwei Chen<sup>1</sup>, Yunduo Liu<sup>1</sup>, Ge Lou<sup>1</sup>

<sup>1</sup>Department of Gynecology Oncology, Cancer Hospital of Harbin Medical University, Harin, 150081, Heilongjiang, China

<sup>2</sup>Department of Anaesthesiology, Cancer Hospital of Harbin Medical University, Harin, 150081, Heilongjiang, China

Correspondence to: Ge Lou, email: louge16@tom.com

Keywords: ovarian cancer, microRNAs, miR-595, ABCB1

Received: July 25, 2016

Accepted: November 09, 2016

Published: November 23, 2016

## ABSTRACT

Ovarian cancer is among the leading cause of cancer-related deaths in females. In this study, we demonstrated that miR-595 expression was downregulated in the ovarian cancer tissues and cell lines. miR-595 expression was lower in the lymph node metastases tissues than in the primary ovarian cancer tissues and normal tissues. Furthermore, miR-595 overexpression suppressed the ovarian cancer cell proliferation, colony formation and invasion and promoted the sensitivity of ovarian cancer cell to cisplatin. We identified ABCB1 as a direct target gene of miR-595 in the ovarian cancer cell. ABCB1 expression was upregulated in the ovarian cancer tissues and cell lines. Moreover, the expression level of ABCB1 was inversely correlated with miR-595 in the ovarian cancer tissues. In addition, overexpression of ABCB1 decreased the miR-595-overexpressing HO8910PM and SKOV-3 cell sensitivity to cisplatin. Ectopic expression of ABCB1 promoted the miR-595-overexpressing HO8910PM and SKOV-3 cell proliferation, colony formation and invasion. These data suggested that miR-595 acted a tumor suppressor role in ovarian cancer development and increased the sensitivity of ovarian cancer to cisplatin.

## INTRODUCTION

Epithelial ovarian cancer accounts for approximately 90% of ovarian cancers and comprises of many different subgroups according to their histological origins, including serous, mucinous, endometrioid, undifferentiated, clear cell and Brenner carcinomas [1–4]. Diagnosis of early-stage ovarian cancer is challenging since it manifests few symptoms [5, 6]. Although many diagnostic approaches are developed, most patients are not diagnosed until it is at an advanced stage [7–10]. The 5-year survival rate of advanced ovarian cancer is only 20–25% [2, 11–13]. Therefore, it is urgent to explore sensitive and specific diagnostic biomarkers for ovarian cancer to improve patient's survival.

MicroRNAs (miRNAs) are a group of endogenous, 18–25 nucleotides long, non-coding RNAs that inhibit gene expression through binding to the 3'UTR of their target mRNAs and induce mRNA cleavage and inhibit the protein translation [14–18]. miRNAs are involved in a lot of important cell biological processes such as

cell development, growth, apoptosis, differentiation, migration and invasion [19–22]. Growing evidences have demonstrated that dysregulation of miRNAs is found in many tumors and plays critical roles in the development, initiation and metastasis of tumors [18, 23–25]. Recently, miRNA have been found to be involved in the drug resistance in many cancers [20, 26, 27].

Recently, several reports have demonstrated that miR-595 plays crucial roles in the progression of various tumors [28–30]. For example, Hao et al [28]. demonstrated that the miR-595 expression was upregulated in the glioblastoma cells and tissues. Overexpression of miR-595 increased the glioblastoma cell proliferation and colony formation through inhibiting SOX7. Chen et al [31]. demonstrated that miR-595 regulated the neuroblastoma cells SH-SY5Y autophagy by repressing ULK1 expression. However, the underlying mechanism of miR-595 in ovarian cancer was still not well elucidated. In this study, we demonstrated that miR-595 expression was downregulated in the ovarian cancer tissues and cell lines. miR-595 overexpression suppressed the ovarian cancer

cell proliferation, colony formation and invasion and promoted the sensitivity of ovarian cancer cell to cisplatin. We identified ABCB1 as a direct target gene of miR-595 in the ovarian cancer cell.

## RESULTS

### miR-595 expression increased the sensitivity of HO8910PM cells to cisplatin

We firstly measured the expression of miR-595 in 5 ovarian cancer cell lines (HG-SOC, HO8910, SKOV-3, HO8910PM and ES2) and immortalized normal fallopian tube epithelial cell line (FTE187). Our data suggested that miR-595 expression was lower in the ovarian cancer cell lines than in the FTE187 cell (Figure 1A). The expression of miR-595 was upregulated in the HO8910PM cell (Figure 1B) and SKOV-3 (Figure 1D) after treated with miR-595 mimic. The HO8910PM cell and SKOV-3 cell response to cisplatin increased after treated with the miR-595 mimic compared with control-transfected cells (Figure 1C and 1E).

### miR-595 expression was downregulated in ovarian cancer tissues

miR-595 expression was downregulated in the ovarian cancer tissues compared to the matched normal ovarian tissues (Figure 2A). miR-595 expression was downregulated in 29 ovarian cancer tissues (29/35; 74.2%) compared to the adjacent tissues (Figure 2B). miR-595 expression was lower in the lymph node metastases tissues compared to the primary ovarian cancer tissues and the normal tissues (Figure 2C).

### Ecotpic expression of miR-595 inhibited ovarian cancer cell proliferation, colony formation and invasion

Ecotpic expression of miR-595 inhibited the HO8910PM and SKOV-3 cell proliferation (Figure 3A and 3D). In line with these, miR-595 overexpression suppressed the expression of ki-67 and PCNA in the HO8910PM cell (Figure 3B and 3C). Overexpression of miR-595 inhibited the expression of ki-67 and PCNA in the SKOV-3 cell (Figure 3E and 3F). Ecotpic expression of miR-595 inhibited the HO8910PM and SKOV-3 cell colony formation (Figure 3G and 3H). In addition, overexpression of miR-595 suppressed the HO8910PM and SKOV-3 cell invasion (Figure 3I and 3J).

### ABCB1 was a direct target of miR-595 in the ovarian cancer cell

As predicted by TargetScan, ABCB1 was a potetial target gene of miR-595 (Figure 4A). The effect of miR-595

on ABCB1 mRNA translation into protein was measured by a luciferase reporter assay (Figure 4B). miR-595 overexpression inhibited the luciferase activity of wild-type reporter but not the mutant ABCB1 3'UTR reporter (Figure 4B). Ecotpic expression of miR-595 inhibited ABCB1 mRNA and protein expression in HO8910PM cells (Figure 4C and 4D).

### The expression of ABCB1 was upregulated in the ovarian cancer tissues

Compared with matched non-tumor tissues, ABCB1 was higher in the ovarian cancer tissues (Figure 5A). Among these, the ABCB1 expression was upregulated in the 25 ovarian cancer tissues (25/35; 71.4%) compared to the adjacent tissues (Figure 5B). ABCB1 expression was higher in the ovarian cancer cell lines compared to in the FTE187 cell (Figure 5C). Interestingly, among pairs of ovarian cancer tissues and non-tumor tissues, ABCB1 expression was inversely correlated with miR-595 expression (Figure 5D).

### miR-595 promoted the sensitivity of HO8910PM cells to cisplatin and inhibited ovarian cancer cell proliferation, colony formation and invasion through targeting ABCB1

The expression of ABCB1 was upregulated in the HO8910PM cell after treated with the ABCB1 vector (Figure 6A and 6B). The responses of HO8910PM and SKOV-3 cell to cisplatin were decreased after transfected with the ABCB1 vector compared with the control vector (Figure 6C and 6D). In addition, the responses of miR-595-overexpressing HO8910PM and SKOV-3 cell to cisplatin were also decreased after transfected with the ABCB1 vector compared with the control vector (Figure 6E and 6I). Ecotpic expression of ABCB1 promoted the HO8910PM and SKOV-3 cell proliferation (Figure 6F and 6G). Overexpression of ABCB1 increased miR-595-overexpressing HO8910PM and SKOV-3 cell proliferation (Figure 6H and 6J). Moreover, ecotpic expression of ABCB1 promoted the miR-595-overexpressing HO8910PM and SKOV-3 cell colony formation (Figure 6K and 6L). In addition, elevated expression of ABCB1 increased the miR-595-overexpressing HO8910PM and SKOV-3 cell invasion (Figure 6M and 6N).

## DISCUSSION

In this study, we demonstrated that miR-595 expression was downregulated in the ovarian cancer tissues and cell lines. miR-595 expression was lower in the lymph node metastases tissues than in the primary ovarian cancer tissues and the normal tissues. Furthermore, miR-595 overexpression suppressed the ovarian cancer cell

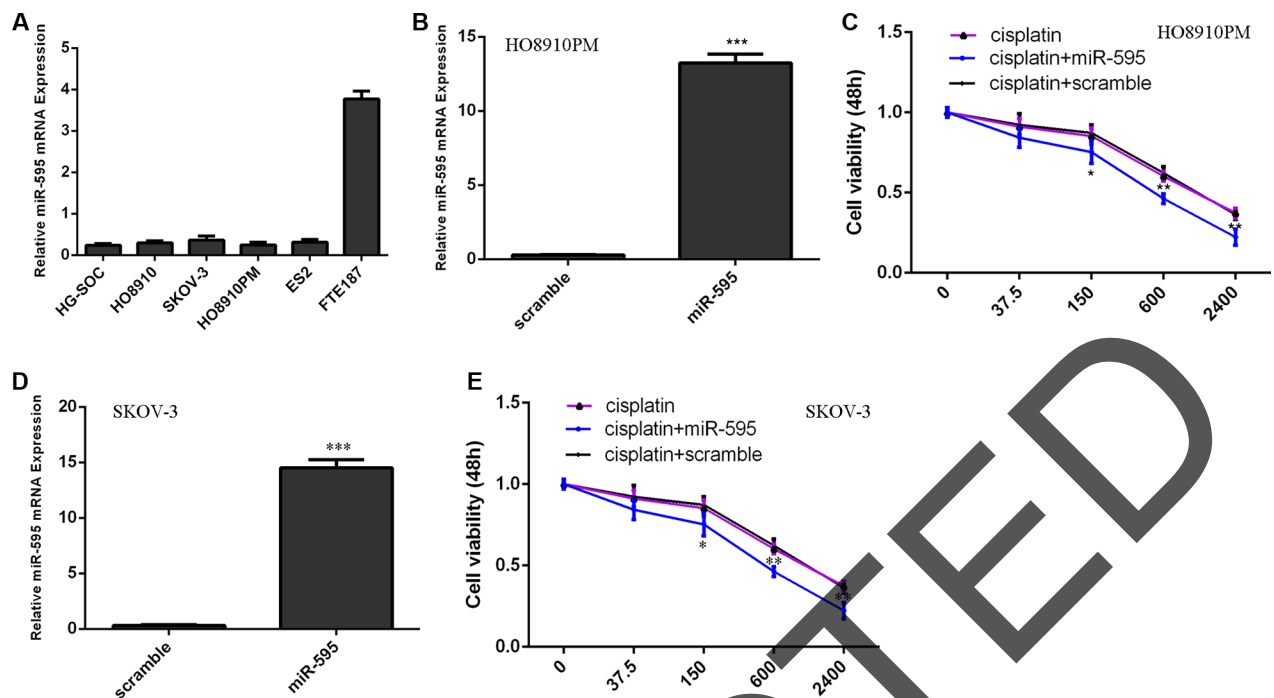

**Figure 1: miR-595 increased the sensitivity of HO8910PM cells to cisplatin.** (A) The miR-595 expression in the 5 ovarian cancer cell lines (HG-SOC, HO8910, SKOV-3, HO8910PM and ES2) and immortalized normal fallopian tube epithelial cell line (FTE187) was determined by qRT-PCR. (B) The expression of miR-595 in the HO8910PM cell after treated with miR-595 mimic was measured using qRT-PCR. (C) The HO8910PM cell response to cisplatin was increased after treated with the miR-595 mimic. (D) The expression of miR-595 in the SKOV-3 cell after treated with miR-595 mimic was measured using qRT-PCR. (E) The SKOV-3 cell response to cisplatin was increased after treated with the miR-595 mimic. \* $p < 0.05$ , \*\* $p < 0.01$  and \*\*\* $p < 0.001$ .

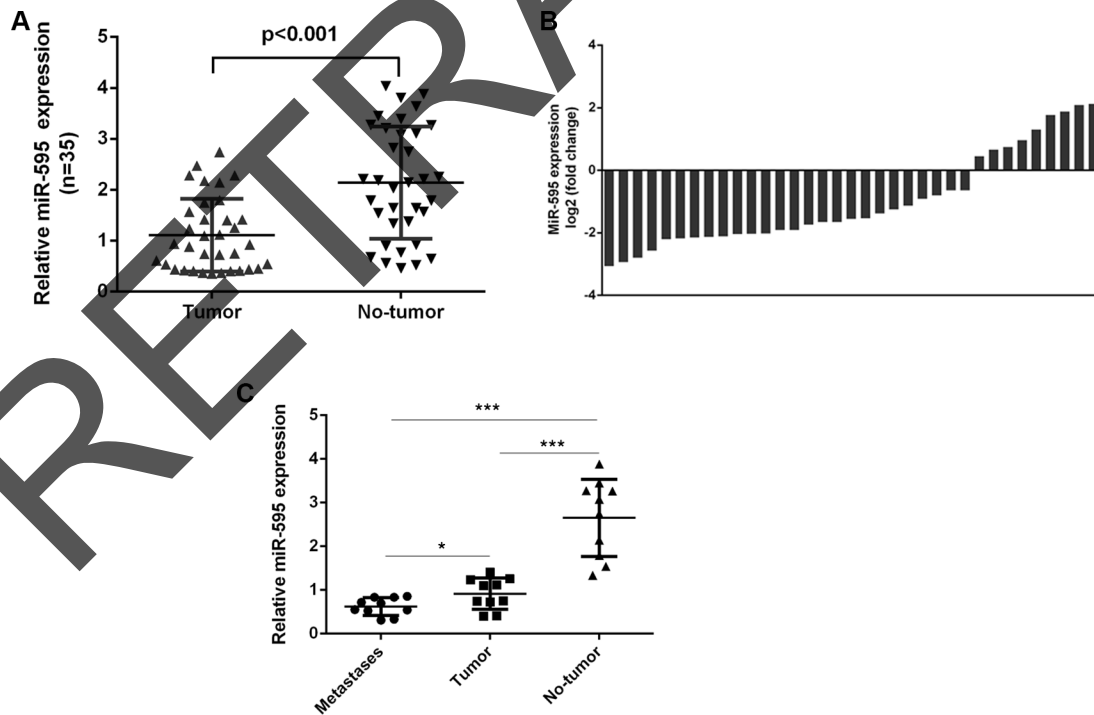

**Figure 2: miR-595 was downregulated in ovarian cancer tissues.** (A) The expression of miR-595 in the ovarian cancer tissues was determined by qRT-PCR. (B) Among these, the miR-595 expression was downregulated in the 29 ovarian cancer tissues (29/35; 74.2%) compared to the adjacent tissues. (C) miR-595 expression in the lymph node metastases tissues and the primary ovarian cancer tissues and the normal tissues was measured by qRT-PCR. \* $p < 0.05$  and \*\*\* $p < 0.001$ .

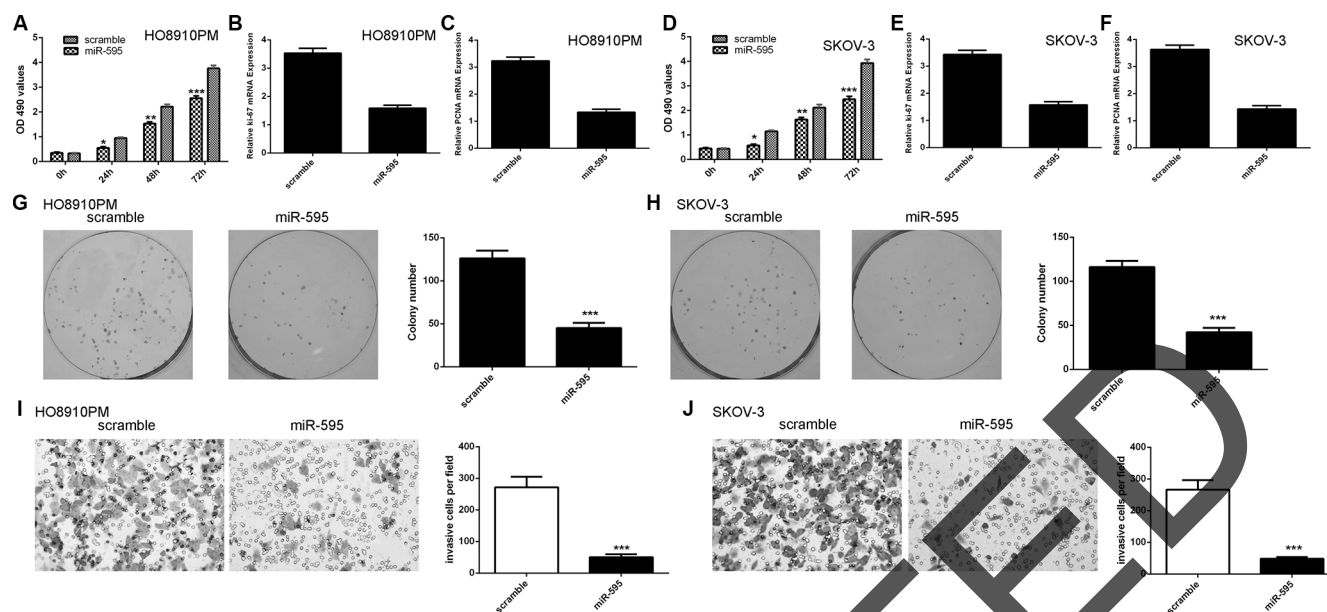

**Figure 3: Ecotpic expression of miR-595 inhibited ovarian cancer cell proliferation, colony formation and invasion.** (A) Overexpression of miR-595 suppressed the HO8910PM cell proliferation. (B) Ecotpic expression of miR-595 inhibited the ki-67 expression in the HO8910PM cell. (C) Overexpression of miR-595 suppressed PCNA expression in the HO8910PM cell. (D) Overexpression of miR-595 suppressed the SKOV-3 cell proliferation. (E) Overexpression of miR-595 suppressed the ki-67 expression in the SKOV-3 cell. (F) Elevated expression of miR-595 decreased the PCNA expression in the SKOV-3 cell. (G) Overexpression of miR-595 suppressed the HO8910PM cell colony formation. The relative conoly number was shown in the right. (H) Elevated expression of miR-595 decreased the SKOV-3 cell colony formation. The relative conoly number was shown in the right. (I) miR-595 overexpression inhibited the HO8910PM cell invasion. The relative invasive cells were shown in the right. (J) Elevated expression of miR-595 suppressed the SKOV-3 cell invasion. The relative invasive cells were shown in the right. \* $p < 0.05$ , \*\* $p < 0.01$  and \*\*\* $p < 0.001$ .

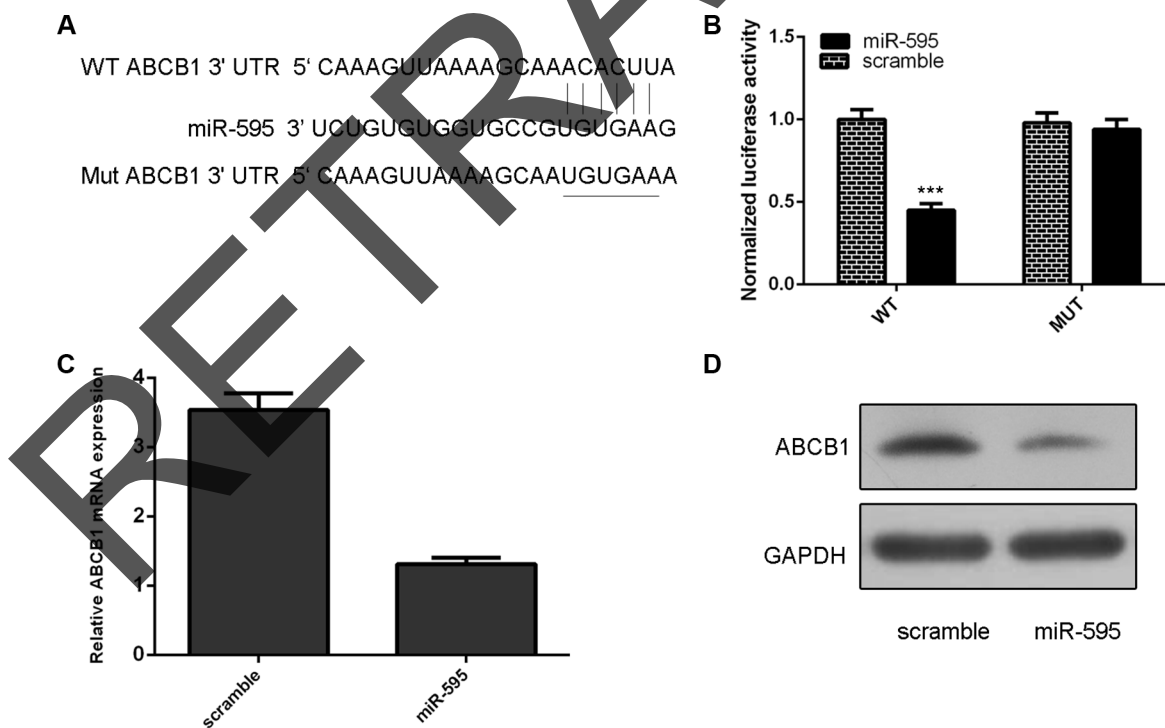

**Figure 4: ABCB1 was a direct target of miR-595 in the ovarian cancer cell.** (A) ABCB1 was a potetial target gene of miR-595 by using TargetScan system. (B) The effect of miR-595 on ABCB1 mRNA translation into protein was measured by a luciferase reporter assay. (C) Ecotpic expression of miR-595 inhibited ABCB1 mRNA expression in HO8910PM cells. (D) Ecotpic miR-595 expression inhibited the ABCB1 protein expression in the HO8910PM cells. \*\*\* $p < 0.001$ .

proliferation, colony formation and invasion and promoted the sensitivity of ovarian cancer cell to cisplatin. We identified ABCB1 as a direct target gene of miR-595 in the ovarian cancer cell. ABCB1 expression was higher in the ovarian cancer tissues and cell lines. The expression level of ABCB1 was inversely correlated with miR-595 in the ovarian cancer tissues. In addition, overexpression of ABCB1 decreased the miR-595-overexpressing HO8910PM cell sensitivity to cisplatin. Moreover, our data demonstrated that ectopic expression of ABCB1 promoted the miR-595-overexpressing HO8910PM cells proliferation, colony formation and invasion. These data suggested that miR-595 acted a tumor suppressor role in ovarian cancer development and increased the sensitivity of ovarian cancer to cisplatin.

Recently, several reports have demonstrated that miR-595 plays important roles in the development of many tumors [28–30]. For example, Hao et al. [28]. showed that the expression of miR-595 was upregulated in the glioblastoma cells and tissues. Overexpression of miR-595 promoted the glioblastoma cell proliferation and

colony formation through targeting SOX7. Another study demonstrated that miR-595 expression was upregulated in the sera of active forms of inflammatory bowel disease patients [32]. Chen et al. [31]. showed that miR-595 regulated the neuroblastoma cells SH-SY5Y autophagy through targeting ULK1. However, the underlying mechanism of miR-595 in ovarian cancer was still not well elucidated. In our study, we firstly determined the expression of miR-595 in the ovarian cancer cell and tissues. Our data showed that miR-595 expression was lower in the ovarian cancer cell lines than in the FTE187 cell. Furthermore, the expression of miR-595 was downregulated in the ovarian cancer tissues compare to their matched normal ovarian tissues. miR-595 expression was lower in the lymph node metastases tissues compared to the primary ovarian cancer tissues and the normal tissues. In addition, overexpression of miR-595 suppressed the ovarian cancer cell proliferation, colony formation and invasion.

Drug resistance is considered to be the major cause to the success of tumor chemotherapy [33–36]. Several studies demonstrated that miRNAs acted an important role

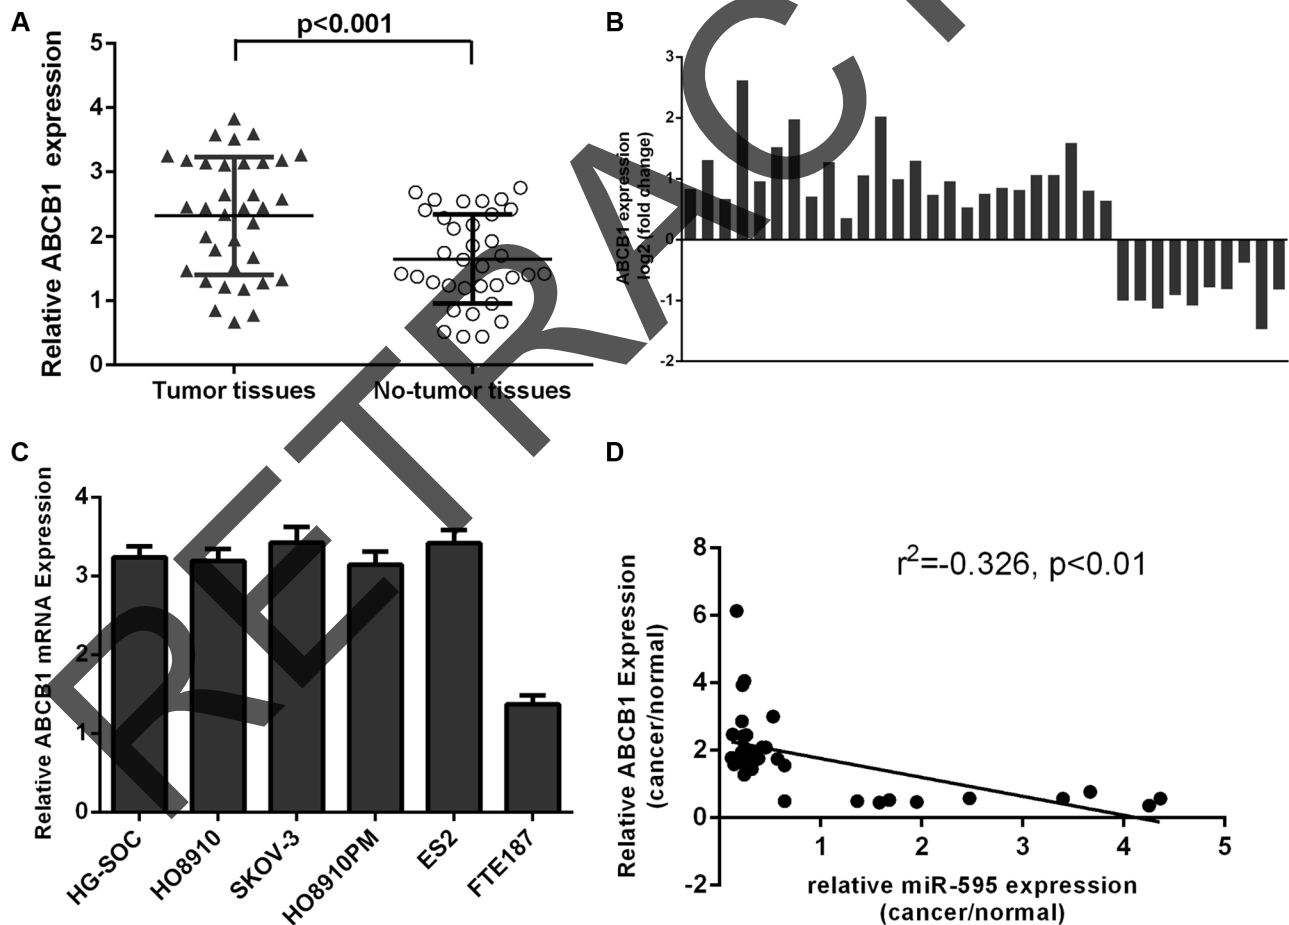

**Figure 5: The expression of ABCB1 was upregulated in the ovarian cancer tissues.** (A) ABCB1 expression was upregulated in the ovarian cancer tissues compared to matched non-tumor tissues. (B) Among these, the ABCB1 expression was upregulated in the 25 ovarian cancer tissues (25/35; 71.4%) compared to the adjacent tissues. (C) The expression of ABCB1 was determined in the ovarian cancer cell lines and FTE187 cell. (D) The expression of ABCB1 was inversely associated with the miR-595 expression in the ovarian cancer tissues.

in the drug resistance [37–39]. MiRNAs can modulate various genes expression and play critical roles in tumor cell apoptosis, proliferation and cell cycle, lead to different cellular sensitivity or resistance to chemotherapeutic agents [40, 41]. In this study, our data found that ectopic expression of miR-595 promoted the sensitivity of HO8910PM cells to cisplatin. These findings suggested that miR-595 acted sensitizes ovarian cancer cells to cisplatin.

ABCB1 belongs to the ABC transporter family and is located on the chromosome 7 [42, 43]. The ABC family contains about 12 putative drug transporters, such as MRP1 (MDR-associated protein-1, encoded by ABCC1) and MDR1 (encoded by ABCB1) [44, 45]. ABCB1 participates in efflux of drugs from tumor cells [46, 47]. In addition, ABCB1 overexpression is considered

to contribute to the drug resistance in various cancers [48]. In our study, we showed that ABCB1 was a direct target gene of miR-595 in ovarian cancer. Ectopic expression of miR-595 inhibited the luciferase activity of the wild-type reporter but not of the mutant ABCB1 reporter, suggesting that miR-595 could directly regulate the ABCB1 expression. Furthermore, miR-595 overexpression suppressed ABCB1 expression in HO8910PM cells. We also investigated that ABCB1 expression was higher in ovarian cancer tissues and cells, and inversely correlated with miR-595 expression in ovarian cancer tissues. MiR-595 suppressed ovarian cancer cell proliferation, colony formation and invasion through targeting ABCB1. Moreover, ABCB1 overexpression decreased the sensitivity of miR-595-overexpressing HO8910PM cells to cisplatin in ovarian cancer. These data suggested that

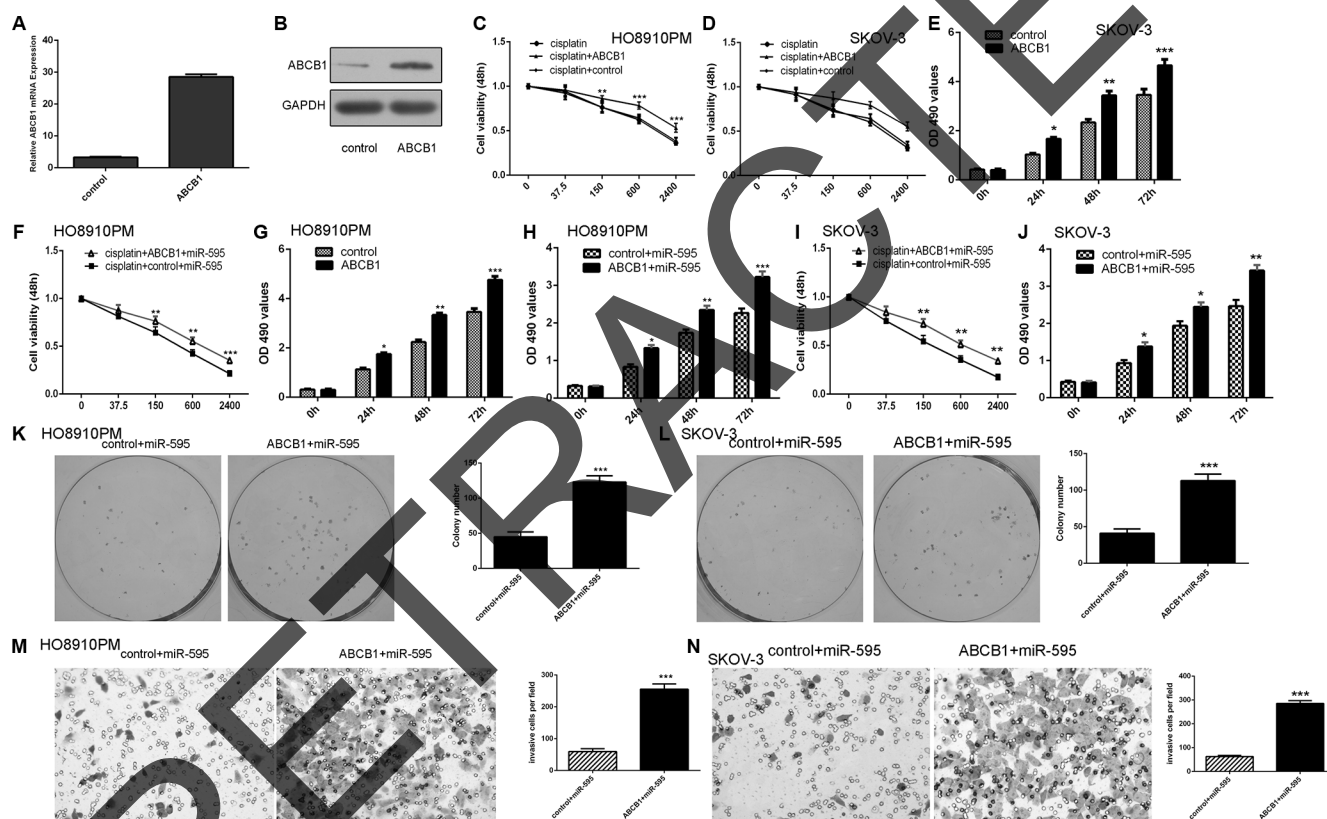

**Figure 6: miR-595 promoted the sensitivity of HO8910PM cells to cisplatin and inhibited ovarian cancer cell proliferation, colony formation and invasion through targeting ABCB1.** (A) The mRNA expression of ABCB1 was increased in the HO8910PM cell after treated with the ABCB1 vector. (B) The protein expression of ABCB1 in the HO8910PM cell was determined by Western blot. (C) Overexpression of ABCB1 decreased the HO8910PM cell response to cisplatin. (D) Overexpression of ABCB1 decreased the SKOV-3 cell response to cisplatin. (E) Overexpression of ABCB1 increased SKOV-3 cell proliferation. (F) The responses of miR-595-overexpressing HO8910PM cells to cisplatin were decreased after transfected with the ABCB1 vector. (G) Ectopic expression of ABCB1 promoted the HO8910PM cell proliferation. (H) Overexpression of ABCB1 increased miR-595-overexpressing HO8910PM cell proliferation. (I) The responses of miR-595-overexpressing SKOV-3 cells to cisplatin were decreased after transfected with the ABCB1 vector. (J) Overexpression of ABCB1 increased miR-595-overexpressing SKOV-3 cell proliferation. (K) Overexpression of ABCB1 increased the miR-595-overexpressing HO8910PM cells colony formation. The relative conoly number was shown in the right. (L) Overexpression of ABCB1 increased the miR-595-overexpressing SKOV-3 cells colony formation. The relative conoly number was shown in the right. (M) Overexpression of ABCB1 increased the miR-595-overexpressing HO8910PM cells invasion. The relative invasive cells were shown in the right. (N) Overexpression of ABCB1 increased the miR-595-overexpressing SKOV-3 cells invasion. The relative invasive cells were shown in the right. \* $p < 0.05$ , \*\* $p < 0.01$  and \*\*\* $p < 0.001$ .

the ability of miR-595 to target ABCB1 may represent a potential mechanism for the post-transcriptional control for ABCB1 expression.

In summary, we showed that miR-595 was downregulated in the ovarian cancer cell and tissues. Ectopic expression of miR-595 suppressed the ovarian cancer cell proliferation, colony formation and invasion and promoted the ovarian cancer cell response to cisplatin through targeting ABCB1. These data suggested that miR-595-ABCB1 was a potential therapeutic target for patients with ovarian cancer.

## MATERIALS AND METHODS

### Tissue samples and cell lines culture and transfection

Human epithelial ovarian tumor tissues and their matched normal ovarian tissues were obtained from our hospital during surgery. None of these patients were received radiotherapy and chemotherapy before surgery. This study was approved by the Ethics Committee of Cancer Hospital of Harbin Medical University. Five ovarian cancer cell lines (HG-SOC, HO8910, SKOV-3, HO8910PM and ES2) and one immortalized normal fallopian tube epithelial cell line (FTE187) were purchased from the Type Culture Collection (Shanghai, China). The cells were kept in the RPMI-1640 medium contained with fetal serum (Invitrogen, USA). miR-595 mimic and the control scramble miRNA were purchased from Gene Pharma (Shanghai, China). Cell transfection was performed by Lipofectamine 2000 (Invitrogen, USA) following to the instruction.

### Quantitative real-time PCR

Total RNA from the cells or tissues was extracted by using TRIzol reagent (Invitrogen, USA) according to the instructions. cDNA was synthesized with the miRNA-specific primer or oligo(dT) using the Synthesis System for RT-PCR (Invitrogen, USA). Quantitative real-time PCR was done to measure the miR-595 and mRNA expression by using SYBR Green PCR mix (Applied Biosystems, CA, USA) on the ABI 7500 System following to the manufacturer's instructions. U6 and GAPDH were used as an internal control for miR-595 and mRNA expression respectively.

### Dual luciferase activity assay

Cells were cultured in the 12-well plates and were transfected with pGL3-ABCB1-3'UTR-MUT or pGL3-ABCB1-3'UTR-WT vector and miR-595 mimic or scramble oligonucleotide using Lipofectamine-2000 (Invitrogen, USA) according to the manufacturer's instructions. After 48 h, luciferase activity was determined

using the Dual-Luciferase Reporter System (Promega, USA). Data are shown as the ratios between firefly and Renilla activities.

### Western blot

Total protein was extracted from cell or tissue by using RIPA lysis buffer and the protein concentration was determined using BCA Protein Assay kit. The total protein was separated on 12% SDS-PAGE gels and then transferred to the membrane. The membrane was blocked and then incubated with primary antibodies (ABCB1, Santa Cruz, USA) and GAPDH (Abcam, USA) (each 1:5000). The membrane was probed with horseradish peroxidase-labeled secondary antibody. Signal was visualized using ECL (enhanced chemiluminescence detection system). GAPDH was used as the control.

### Cell proliferation, invasion and colony formation assays

Cell proliferation was evaluated by using CCK-8 (Cell Counting Kit-8) according to the manufacturer's instructions. Cells were cultured in the 96-well plate and incubated for 24 h, 48 h and 72 h respectively. CCK-8 reagent (10 mL) was put to each well and incubated for 2–3 h. The absorbance value at 450 nm was measured by the microplate reader. For colony formation analysis, cells were plated in the 6-well plates and were incubated for 2 weeks. Colonies were fixed and stained with the crystal violet and counted. The invasive potential of cells was determined by transwell inserts. Cells were cultured in the upper insert coated with the matrigel matrix (BD). FBS (10%) medium was put into the lower chamber. After 48 h, noninvaded cell was removed with the cotton swab and was fixed with methanol, stained with the crystal violet and counted.

### Statistical analysis

Student's *t*-test or one-way ANOVA was used to measure the statistical significance between groups by using SPSS 17.0 software.  $P < 0.05$  was considered significant difference and Data was shown as means  $\pm$  SD (standard deviation).

## ACKNOWLEDGMENTS AND FUNDING

This work was supported by grants from the National Natural Science Foundation of China (Grant. 81472028).

## CONFLICTS OF INTEREST

None.

## REFERENCES

1. Nodin B, Zendeirokh N, Sundstrom M, Jirstrom K. Clinicopathological correlates and prognostic significance of KRAS mutation status in a pooled prospective cohort of epithelial ovarian cancer. *Diagnostic pathology*. 2013; 8:106.
2. Denoyelle C, Lambert B, Meryet-Figuier M, Vigneron N, Brotin E, Lecerf C, Abeillard E, Giffard F, Louis MH, Gauduchon P, Juin P, Poulain L. miR-491-5p-induced apoptosis in ovarian carcinoma depends on the direct inhibition of both BCL-XL and EGFR leading to BIM activation. *Cell death & disease*. 2014; 5:e1445.
3. Dong R, Liu X, Zhang Q, Jiang Z, Li Y, Wei Y, Yang Q, Liu J, Wei JJ, Shao C, Liu Z, Kong B. miR-145 inhibits tumor growth and metastasis by targeting metadherin in high-grade serous ovarian carcinoma. *Oncotarget*. 2014; 5:10816–10829. doi: 10.18632/oncotarget.2522.
4. Wang Y, Yan S, Liu X, Zhang W, Li Y, Dong R, Zhang Q, Yang Q, Yuan C, Shen K, Kong B. miR-1236-3p represses the cell migration and invasion abilities by targeting ZEB1 in high-grade serous ovarian carcinoma. *Oncology reports*. 2014; 31:1905–1910.
5. Chang H, Zhou X, Wang ZN, Song YX, Zhao F, Gao P, Chiang Y, Xu HM. Increased expression of miR-148b in ovarian carcinoma and its clinical significance. *Molecular medicine reports*. 2012; 5:1277–1280.
6. Chen X, Chen S, Xiu YL, Sun KX, Zong ZH, Zhao Y. RhoC is a major target of microRNA-93-5P in epithelial ovarian carcinoma tumorigenesis and progression. *Molecular cancer*. 2015; 14:31.
7. Mahajan A, Liu Z, Gellert L, Zou X, Yang G, Lee P, Yang X, Wei JJ. HMGA2: a biomarker significantly overexpressed in high-grade ovarian serous carcinoma. *Modern pathology*. 2010; 23:673–681.
8. McMillen BD, Aponte MM, Liu Z, Helenowski IB, Scholtens DM, Buttin BM, Wei JJ. Expression analysis of MIR182 and its associated target genes in advanced ovarian carcinoma. *Modern pathology*. 2012; 25:1644–1653.
9. Flavin RJ, Smyth PC, Finn SP, Laios A, O'Toole SA, Barrett C, Ring M, Denning KM, Li J, Aherne ST, Aziz NA, Alhadi A, Sheppard BL, et al. Altered eIF6 and Dicer expression is associated with clinicopathological features in ovarian serous carcinoma patients. *Modern pathology*. 2008; 21:676–684.
10. Liu Z, Liu J, Segura MF, Shao C, Lee P, Gong Y, Hernando E, Wei JJ. MiR-182 overexpression in tumorigenesis of high-grade serous ovarian carcinoma. *The Journal of pathology*. 2012; 228:204–215.
11. Tang H, Yao L, Tao X, Yu Y, Chen M, Zhang R, Xu C. miR-9 functions as a tumor suppressor in ovarian serous carcinoma by targeting TLN1. *International journal of molecular medicine*. 2013; 32:381–388.
12. Flavin R, Smyth P, Barrett C, Russell S, Wen H, Wei J, Laios A, O'Toole S, Ring M, Denning K, Li J, Aherne S, Sammarae D, et al. miR-29b expression is associated with disease-free survival in patients with ovarian serous carcinoma. *International journal of gynecological cancer*. 2009; 19:641–647.
13. Wurz K, Garcia RL, Goff BA, Mitchell PS, Lee JH, Tewari M, Swisher EM. MiR-221 and MiR-222 alterations in sporadic ovarian carcinoma: Relationship to CDKN1B, CDKN1C and overall survival. *Genes, chromosomes & cancer*. 2010; 49:577–584.
14. Li Z, Yu X, Shen J, Jiang Y. MicroRNA dysregulation in uveal melanoma: a new player enters the game. *Oncotarget*. 2015; 6:4562–8. doi: 10.18632/oncotarget.2923.
15. Niu G, Li B, Sun J, Sun L. miR-454 is down-regulated in osteosarcomas and suppresses cell proliferation and invasion by directly targeting c-Met. *Cell proliferation*. 2015; 48:348–355.
16. Yu X, Li Z, Chan MT, Wu WK. microRNA deregulation in keloids: an opportunity for clinical intervention? *Cell proliferation*. 2015; 48:626–630.
17. Yu X, Li Z, Yu J, Chan MT, Wu WK. MicroRNAs predict and modulate responses to chemotherapy in colorectal cancer. *Cell proliferation*. 2015; 48:503–510.
18. Huang J, Zhang SY, Gao YM, Liu YF, Liu YB, Zhao ZG, Yang K. MicroRNAs as oncogenes or tumour suppressors in oesophageal cancer: potential biomarkers and therapeutic targets. *Cell proliferation*. 2014; 47:277–286.
19. Wang LJ, He CC, Sui X, Cai MJ, Zhou CY, Ma JL, Wu L, Wang H, Han SX, Zhu Q. MiR-21 promotes intrahepatic cholangiocarcinoma proliferation and growth *in vitro* and *in vivo* by targeting PTPN14 and PTEN. *Oncotarget*. 2015; 6:5932–5946. doi: 10.18632/oncotarget.3465.
20. Wang Z, Wang N, Liu P, Chen Q, Situ H, Xie T, Zhang J, Peng C, Lin Y, Chen J. MicroRNA-25 regulates chemoresistance-associated autophagy in breast cancer cells, a process modulated by the natural autophagy inducer isoliquiritigenin. *Oncotarget*. 2014; 5:7013–7026. doi: 10.18632/oncotarget.2192.
21. Xu M, Jin H, Xu CX, Sun B, Mao Z, Bi WZ, Wang Y. miR-382 inhibits tumor growth and enhance chemosensitivity in osteosarcoma. *Oncotarget*. 2014; 5:9472–9483. doi: 10.18632/oncotarget.2418.
22. Li Z, Yu X, Shen J, Liu Y, Chan MT, Wu WK. MicroRNA dysregulation in rhabdomyosarcoma: a new player enters the game. *Cell proliferation*. 2015; 48:511–516.
23. Li Z, Yu X, Wang Y, Shen J, Wu WK, Liang J, Feng F. By downregulating TIAM1 expression, microRNA-329 suppresses gastric cancer invasion and growth. *Oncotarget*. 2015; 6:17559–17569. doi: 10.18632/oncotarget.2755
24. Fu LL, Yang Y, Xu HL, Cheng Y, Wen X, Ouyang L, Bao JK, Wei YQ, Liu B. Identification of novel caspase/autophagy-related gene switch to cell fate decisions in breast cancers. *Cell proliferation*. 2013; 46:67–75.
25. Li J, You T, Jing J. MiR-125b inhibits cell biological progression of Ewing's sarcoma by suppressing the PI3K/Akt signalling pathway. *Cell proliferation*. 2014; 47:152–160.

26. Okamoto K, Miyoshi K, Murawaki Y. miR-29b, miR-205 and miR-221 enhance chemosensitivity to gemcitabine in HuH28 human cholangiocarcinoma cells. *PloS one*. 2013; 8:e77623.
27. Zhao G, Cai C, Yang T, Qiu X, Liao B, Li W, Ji Z, Zhao J, Zhao H, Guo M, Ma Q, Xiao C, Fan Q, et al. MicroRNA-221 induces cell survival and cisplatin resistance through PI3K/Akt pathway in human osteosarcoma. *PloS one*. 2013; 8:e53906.
28. Hao Y, Zhang S, Sun S, Zhu J, Xiao Y. MiR-595 targeting regulation of SOX7 expression promoted cell proliferation of human glioblastoma. *Biomedicine & pharmacotherapy = Biomedecine & pharmacotherapie*. 2016; 80:121–126.
29. Alkhatibi HA, McLornan DP, Kulasekararaj AG, Malik F, Seidl T, Darling D, Gaken J, Mufti GJ. RPL27A is a target of miR-595 and may contribute to the myelodysplastic phenotype through ribosomal dysgenesis. *Oncotarget*. 2016; 7:47875–47890. doi: 10.18632/oncotarget.10293.
30. Fornari F, Ferracin M, Trere D, Milazzo M, Marinelli S, Galassi M, Venerandi L, Pollutri D, Patrizi C, Borghi A, Foschi FG, Stefanini GF, Negrini M, et al. Circulating microRNAs, miR-939, miR-595, miR-519d and miR-494, Identify Cirrhotic Patients with HCC. *PloS one*. 2015; 10:e0141448.
31. Chen Y, Wang S, Zhang L, Xie T, Song S, Huang J, Zhang Y, Ouyang L, Liu B. Identification of ULK1 as a novel biomarker involved in miR-4487 and miR-595 regulation in neuroblastoma SH-SY5Y cell autophagy. *Scientific reports*. 2015; 5:11035.
32. Krissansen GW, Yang Y, McQueen FM, Leung E, Peek D, Chan YC, Print C, Dalbeth N, Williams M, Fraser AG. Overexpression of miR-595 and miR-1246 in the sera of patients with active forms of inflammatory bowel disease. *Inflammatory bowel diseases*. 2015; 21:520–530.
33. Kutanzi KR, Yurchenko OV, Beland FA, Checkhun VF, Pogribny IP. MicroRNA-mediated drug resistance in breast cancer. *Clinical epigenetics*. 2011; 2:171–185.
34. Chen D, Huang J, Zhang K, Pan B, Chen J, De W, Wang R, Chen L. MicroRNA-451 induces epithelial-mesenchymal transition in docetaxel-resistant lung adenocarcinoma cells by targeting proto-oncogene c-Myc. *Eur J Cancer*. 2014; 50:3050–3067.
35. Qin J, Luo M, Qian H, Chen W. Upregulated miR-182 increases drug resistance in cisplatin-treated HCC cell by regulating TP53INP1. *Gene*. 2014; 538:342–347.
36. Zhu W, Shan X, Wang T, Shu Y, Liu P. miR-181b modulates multidrug resistance by targeting BCL2 in human cancer cell lines. *International journal of cancer*. 2010; 127:2520–2529.
37. Qiu T, Zhou L, Wang T, Xu J, Wang J, Chen W, Zhou X, Huang Z, Zhu W, Shu Y, Liu P. miR-503 regulates the resistance of non-small cell lung cancer cells to cisplatin by targeting Bcl-2. *International journal of molecular medicine*. 2013; 32:593–598.
38. Liu K, Liu S, Zhang W, Ji B, Wang Y, Liu Y. miR222 regulates sorafenib resistance and enhance tumorigenicity in hepatocellular carcinoma. *International journal of oncology*. 2014; 45:1537–1546.
39. Qu J, Zhao L, Zhang P, Wang J, Xu N, Mi W, Jiang X, Zhang C. MicroRNA-195 chemosensitizes colon cancer cells to the chemotherapeutic drug doxorubicin by targeting the first binding site of BCL2L2 mRNA. *Journal of cellular physiology*. 2013.
40. Zhao X, Yang L, Hu J. Down-regulation of miR-27a might inhibit proliferation and drug resistance of gastric cancer cells. *Journal of experimental & clinical cancer research*. 2011; 30:55.
41. Zhou Y, Huang Z, Wu S, Zang X, Liu M, Shi J. miR-33a is up-regulated in chemoresistant osteosarcoma and promotes osteosarcoma cell resistance to cisplatin by down-regulating TWIST. *Journal of experimental & clinical cancer research*. 2014; 33:12.
42. Fukunaga K, Nakagawa H, Ishikawa T, Kubo M, Mushiroda T. ABCB1 polymorphism is associated with atorvastatin-induced liver injury in Japanese population. *BMC genetics*. 2016; 17:79.
43. Zahari Z, Lee CS, Ibrahim MA, Musa N, Mohd Yasin MA, Lee YY, Tan SC, Mohamad N, Ismail R. Relationship between ABCB1 polymorphisms and serum methadone concentration in patients undergoing methadone maintenance therapy (MMT). *The American journal of drug and alcohol abuse*. 2016:1–10.
44. Mittapalli RK, Chung AH, Parrish KE, Crabtree D, Halvorson KG, Hu G, Elmquist WF, Becher OJ. ABCG2 and ABCB1 Limit the Efficacy of Dasatinib in a PDGF-B-Driven Brainstem Glioma Model. *Molecular cancer therapeutics*. 2016; 15:819–829.
45. Bauer M, Romermann K, Karch R, Wulkersdorfer B, Stanek J, Philippe C, Maier-Salamon A, Haslacher H, Jungbauer C, Wadsak W, Jager W, Loscher W, Hacker M, et al. Pilot PET Study to Assess the Functional Interplay Between ABCB1 and ABCG2 at the Human Blood-Brain Barrier. *Clinical pharmacology and therapeutics*. 2016; 100:131–141.
46. Muthusamy G, Balupillai A, Ramasamy K, Shanmugam M, Gunaseelan S, Mary B, Prasad NR. Ferulic acid reverses ABCB1-mediated paclitaxel resistance in MDR cell lines. *European journal of pharmacology*. 2016; 786:194–203.
47. Tsuji D, Yokoi M, Suzuki K, Daimon T, Nakao M, Ayuhara H, Kogure Y, Shibata K, Hayashi T, Hirai K, Inoue K, Hama T, Takeda K, et al. Influence of ABCB1 and ABCG2 polymorphisms on the antiemetic efficacy in patients with cancer receiving cisplatin-based chemotherapy: a TRIPLE pharmacogenomics study. *The pharmacogenomics journal*. 2016.
48. Wu DD, Li XS, Meng XN, Yan J, Zong ZH. MicroRNA-873 mediates multidrug resistance in ovarian cancer cells by targeting ABCB1. *Tumour biology*. 2016.
